# Supplementary material for: Dose-Ranging Plasma and Genital Tissue Pharmacokinetics and Biodegradation of Ultra-Long-Acting Cabotegravir In Situ Forming Implant
Source: MDPI journal article supplement (doi:10.3390/pharmaceutics15051487), 2023-05-13
Supplement: s1 [file s1]

# Supplementary Materials: Dose-ranging plasma and genital tissue pharmacokinetics and biodegradation of ultra-long-acting cabotegravir in situ forming implant

Isabella C. Young, Allison Thorson, Roopali Shrivastava, Craig Sykes, Amanda Schauer, Mackenzie Cottrell, Angela D.M. Kashuba, S. Rahima Benhabbour

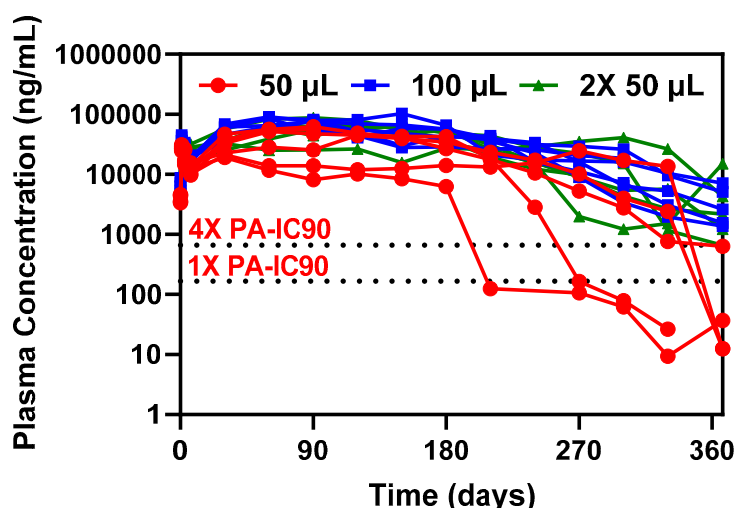

**Figure S1. Individual replicates of CAB plasma concentrations after 367 days post-injection.** CAB plasma concentrations after 50  $\mu$ L, 100  $\mu$ L, or 2 $\times$ 50  $\mu$ L injection of CAB ISFI for 367 days. 4 $\times$  PA-IC90 is 664 ng/mL and 1 $\times$  PA-IC90 is 166 ng/mL. Each dose elicited n=5-6 mice/timepoint.

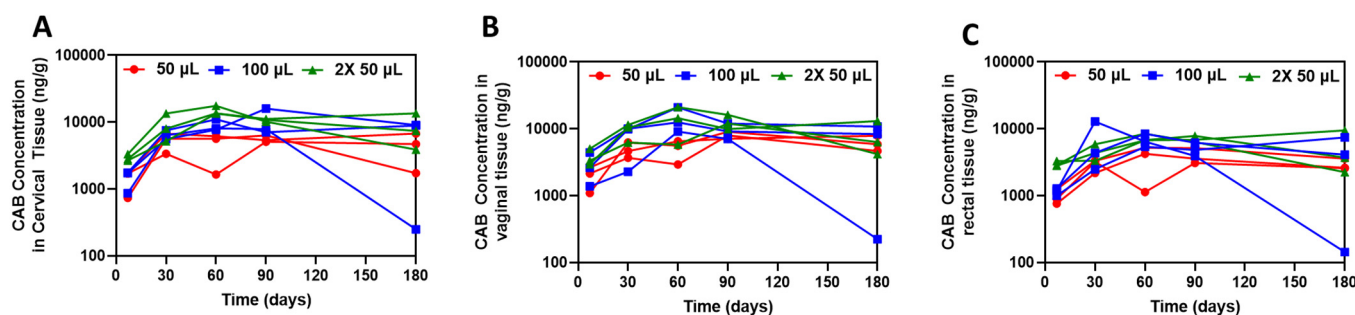

**Figure S2. Individual replicates of CAB concentrations in tissues.** (A) Individual replicates (n = 3/timepoint per dose) of CAB concentration in cervical tissue after CAB ISFI injection in female BALB/c mice. (B) Individual replicates (n = 3/timepoint per dose) of CAB concentration in vaginal tissue after CAB ISFI injection in female BALB/c mice. (C) Individual replicates (n = 3/timepoint per dose) of CAB concentration in rectal tissue after CAB ISFI injection in female BALB/c mice.

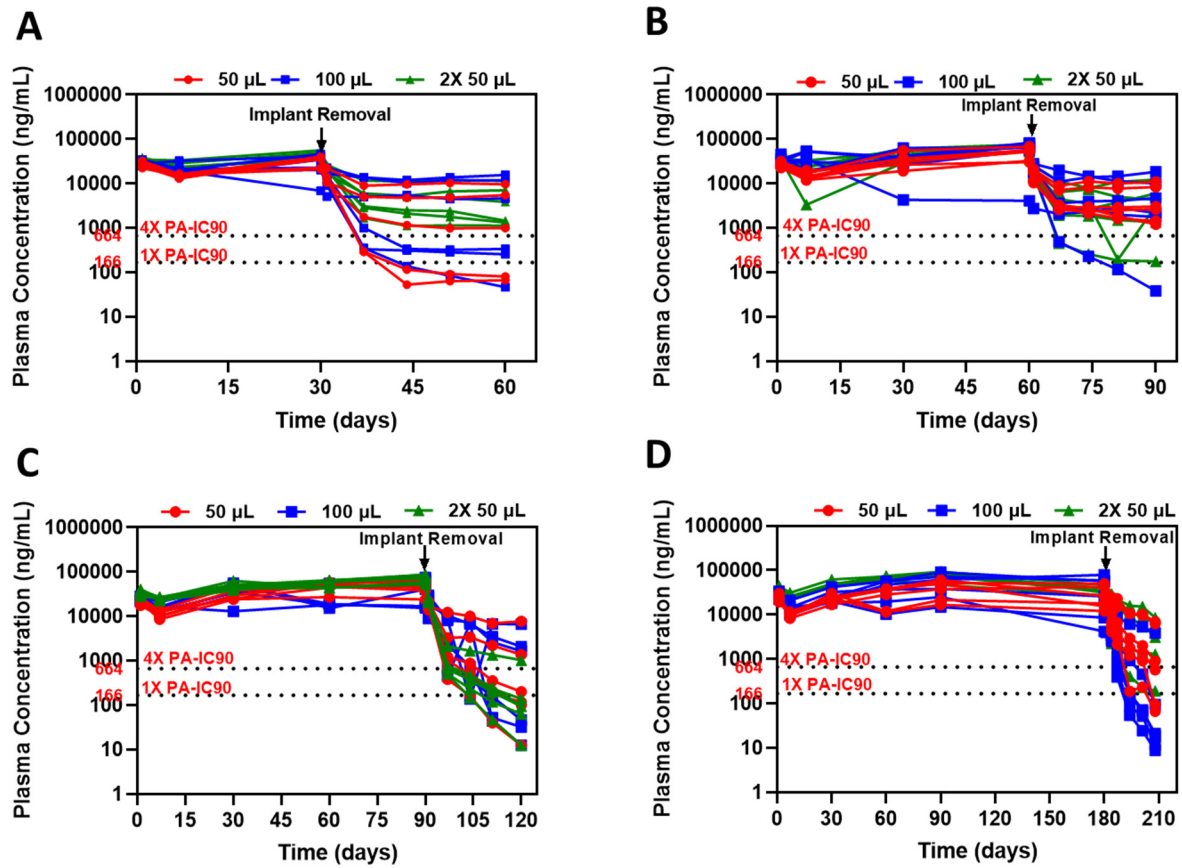

Figure S3. Individual replicates of CAB plasma concentrations after depot removal. (A–D) Individual replicates ( $n = 5\text{--}6/\text{timepoint}$  per dose) of CAB concentrations in plasma after ISFI removal at 30, 60, 90, and 180 days post-administration, respectively.
